# Supplementary material for: Evolutionary response to global change: Climate and land use interact to shape color polymorphism in a woodland salamander
Source: PubMed Central journal article supplement (PMC5528218; doi:10.1002/ece3.3118), 2017-06-12
Supplement: ECE3-7-5426-s001.pdf [file ECE3-7-5426-s001.pdf]

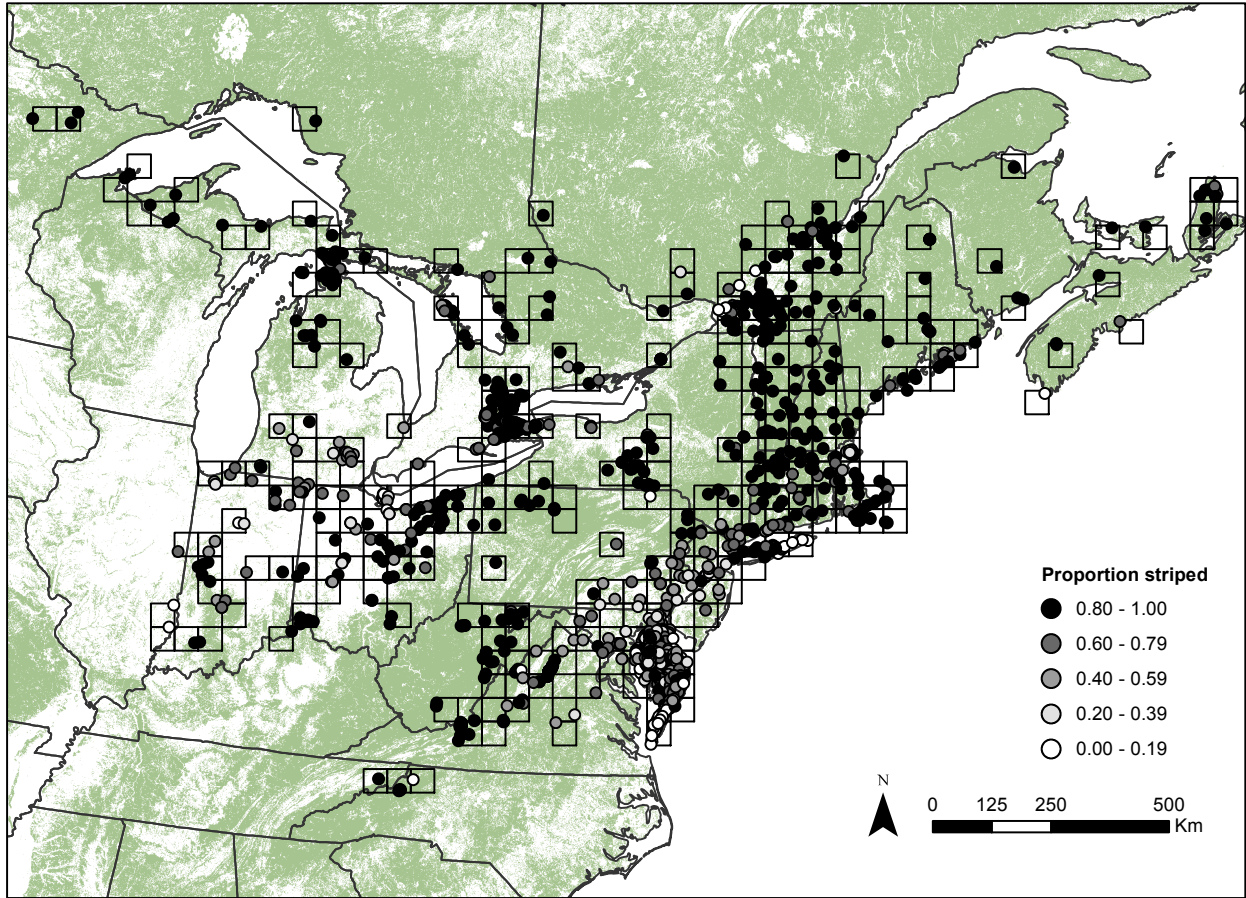

**Fig. S1.** Map of forest cover (green), study sites (circles), and 50x50-km landscape blocks (grid cells) for eastern red-backed salamanders (*Plethodon cinereus*) sampled from 1880 to 2015 in North America. Symbol fill for study sites represents observed proportion of striped *P. cinereus*.

**Table S1.** Standardized coefficients for regressions and covariances in a path analysis model of *Plethodon cinereus* morph frequencies in landscape blocks at varying spatial scales (10 x 10 km, 50 x 50 km, 100 x 100 km) and when the minimum number of individuals (*n*) at each site is 20 (*N* = 1170 sites), 30 (*N* = 848 sites), 40 (*N* = 667 sites), and 50 (*N* = 574 sites). Bold indicates significant coefficients at  $P \leq 0.05$ .

| Spatial scale                | Relationship                 | Variables                    | Standardized coefficients |               |               |               |
|------------------------------|------------------------------|------------------------------|---------------------------|---------------|---------------|---------------|
|                              |                              |                              | <i>n</i> ≥ 20             | <i>n</i> ≥ 30 | <i>n</i> ≥ 40 | <i>n</i> ≥ 50 |
| 10 x 10 km                   | Regressions                  | Striped ← Temperature        | <b>-0.383</b>             | <b>-0.358</b> | <b>-0.325</b> | <b>-0.326</b> |
|                              |                              | Striped ← Forest             | <b>0.297</b>              | <b>0.312</b>  | <b>0.325</b>  | <b>0.305</b>  |
|                              |                              | Striped ← Temperature*Forest | <b>0.088</b>              | <b>0.106</b>  | <b>0.102</b>  | 0.084†        |
|                              |                              | Temperature ← Year           | <b>-0.349</b>             | <b>-0.281</b> | <b>-0.182</b> | <b>-0.136</b> |
|                              |                              | Forest ← Year                | <b>0.152</b>              | <b>0.167</b>  | <b>-0.152</b> | <b>0.165</b>  |
|                              | Covariances                  | Temperature, Forest          | -0.110                    | -0.079        | -0.037        | -0.030        |
|                              | 50 x 50 km                   | Regressions                  | Striped ← Temperature     | <b>-0.347</b> | <b>-0.320</b> | <b>-0.278</b> |
| Striped ← Forest             |                              |                              | <b>0.335</b>              | <b>0.353</b>  | <b>0.362</b>  | <b>0.343</b>  |
| Striped ← Temperature*Forest |                              |                              | <b>0.152</b>              | <b>0.171</b>  | <b>0.162</b>  | 0.122*        |
| Temperature ← Year           |                              |                              | <b>-0.362</b>             | <b>-0.299</b> | <b>-0.201</b> | <b>-0.154</b> |
| Forest ← Year                |                              |                              | <b>0.171</b>              | <b>0.167</b>  | 0.120         | 0.122         |
| Covariances                  |                              | Temperature, Forest          | <b>-0.253</b>             | <b>-0.226</b> | -0.172        | -0.159        |
| 100 x 100 km                 |                              | Regressions                  | Striped ← Temperature     | <b>-0.350</b> | <b>-0.327</b> | <b>-0.288</b> |
|                              | Striped ← Forest             |                              | <b>0.320</b>              | <b>0.344</b>  | <b>0.360</b>  | <b>0.351</b>  |
|                              | Striped ← Temperature*Forest |                              | <b>0.162</b>              | <b>0.186</b>  | <b>0.176</b>  | <b>0.142</b>  |
|                              | Temperature ← Year           |                              | <b>-0.371</b>             | <b>-0.308</b> | <b>-0.209</b> | -0.164        |
|                              | Forest ← Year                |                              | <b>0.209</b>              | <b>0.199</b>  | 0.146         | 0.127         |
|                              | Covariances                  | Temperature, Forest          | -0.197                    | -0.149        | -0.070        | -0.045        |

† $P = 0.075$ , \* $P = 0.055$

**Table S2.** Confidence intervals (95%) for standardized coefficients based on 1000 iterations of a path analysis model when randomly choosing one site within each 50 x 50-km landscape block ( $n = 292$ ) in each iteration.

| Relationship | Variables                               | Low <sub>95%</sub> | High <sub>95%</sub> |
|--------------|-----------------------------------------|--------------------|---------------------|
| Regressions  | Striped $\leftarrow$ Temperature        | -0.41              | -0.31               |
|              | Striped $\leftarrow$ Forest             | 0.24               | 0.34                |
|              | Striped $\leftarrow$ Temperature*Forest | 0.12               | 0.23                |
|              | Temperature $\leftarrow$ Year           | -0.33              | -0.24               |
|              | Forest $\leftarrow$ Year                | 0.21               | 0.31                |
| Covariances  | Temperature, Forest                     | -0.33              | -0.31               |
